# Supplementary material for: Mitotic progression becomes irreversible in prometaphase and collapses when Wee1 and Cdc25 are inhibited
Source: PubMed Central journal article supplement — Mol Biol Cell. 2011 Apr 15;22(8):1191–206. doi: 10.1091/mbc.E10-07-0599 (PMC3078080; doi:10.1091/mbc.e10-07-0599), 2011-04-15

# Supplemental Figure 1

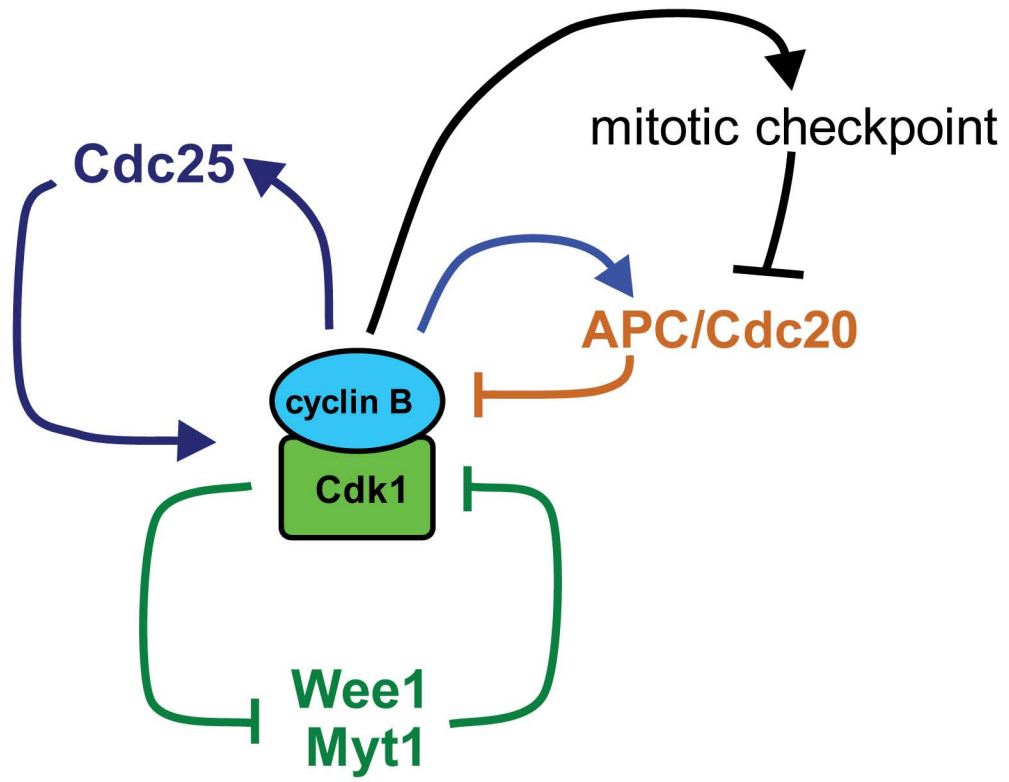

# Supplemental Figure 2

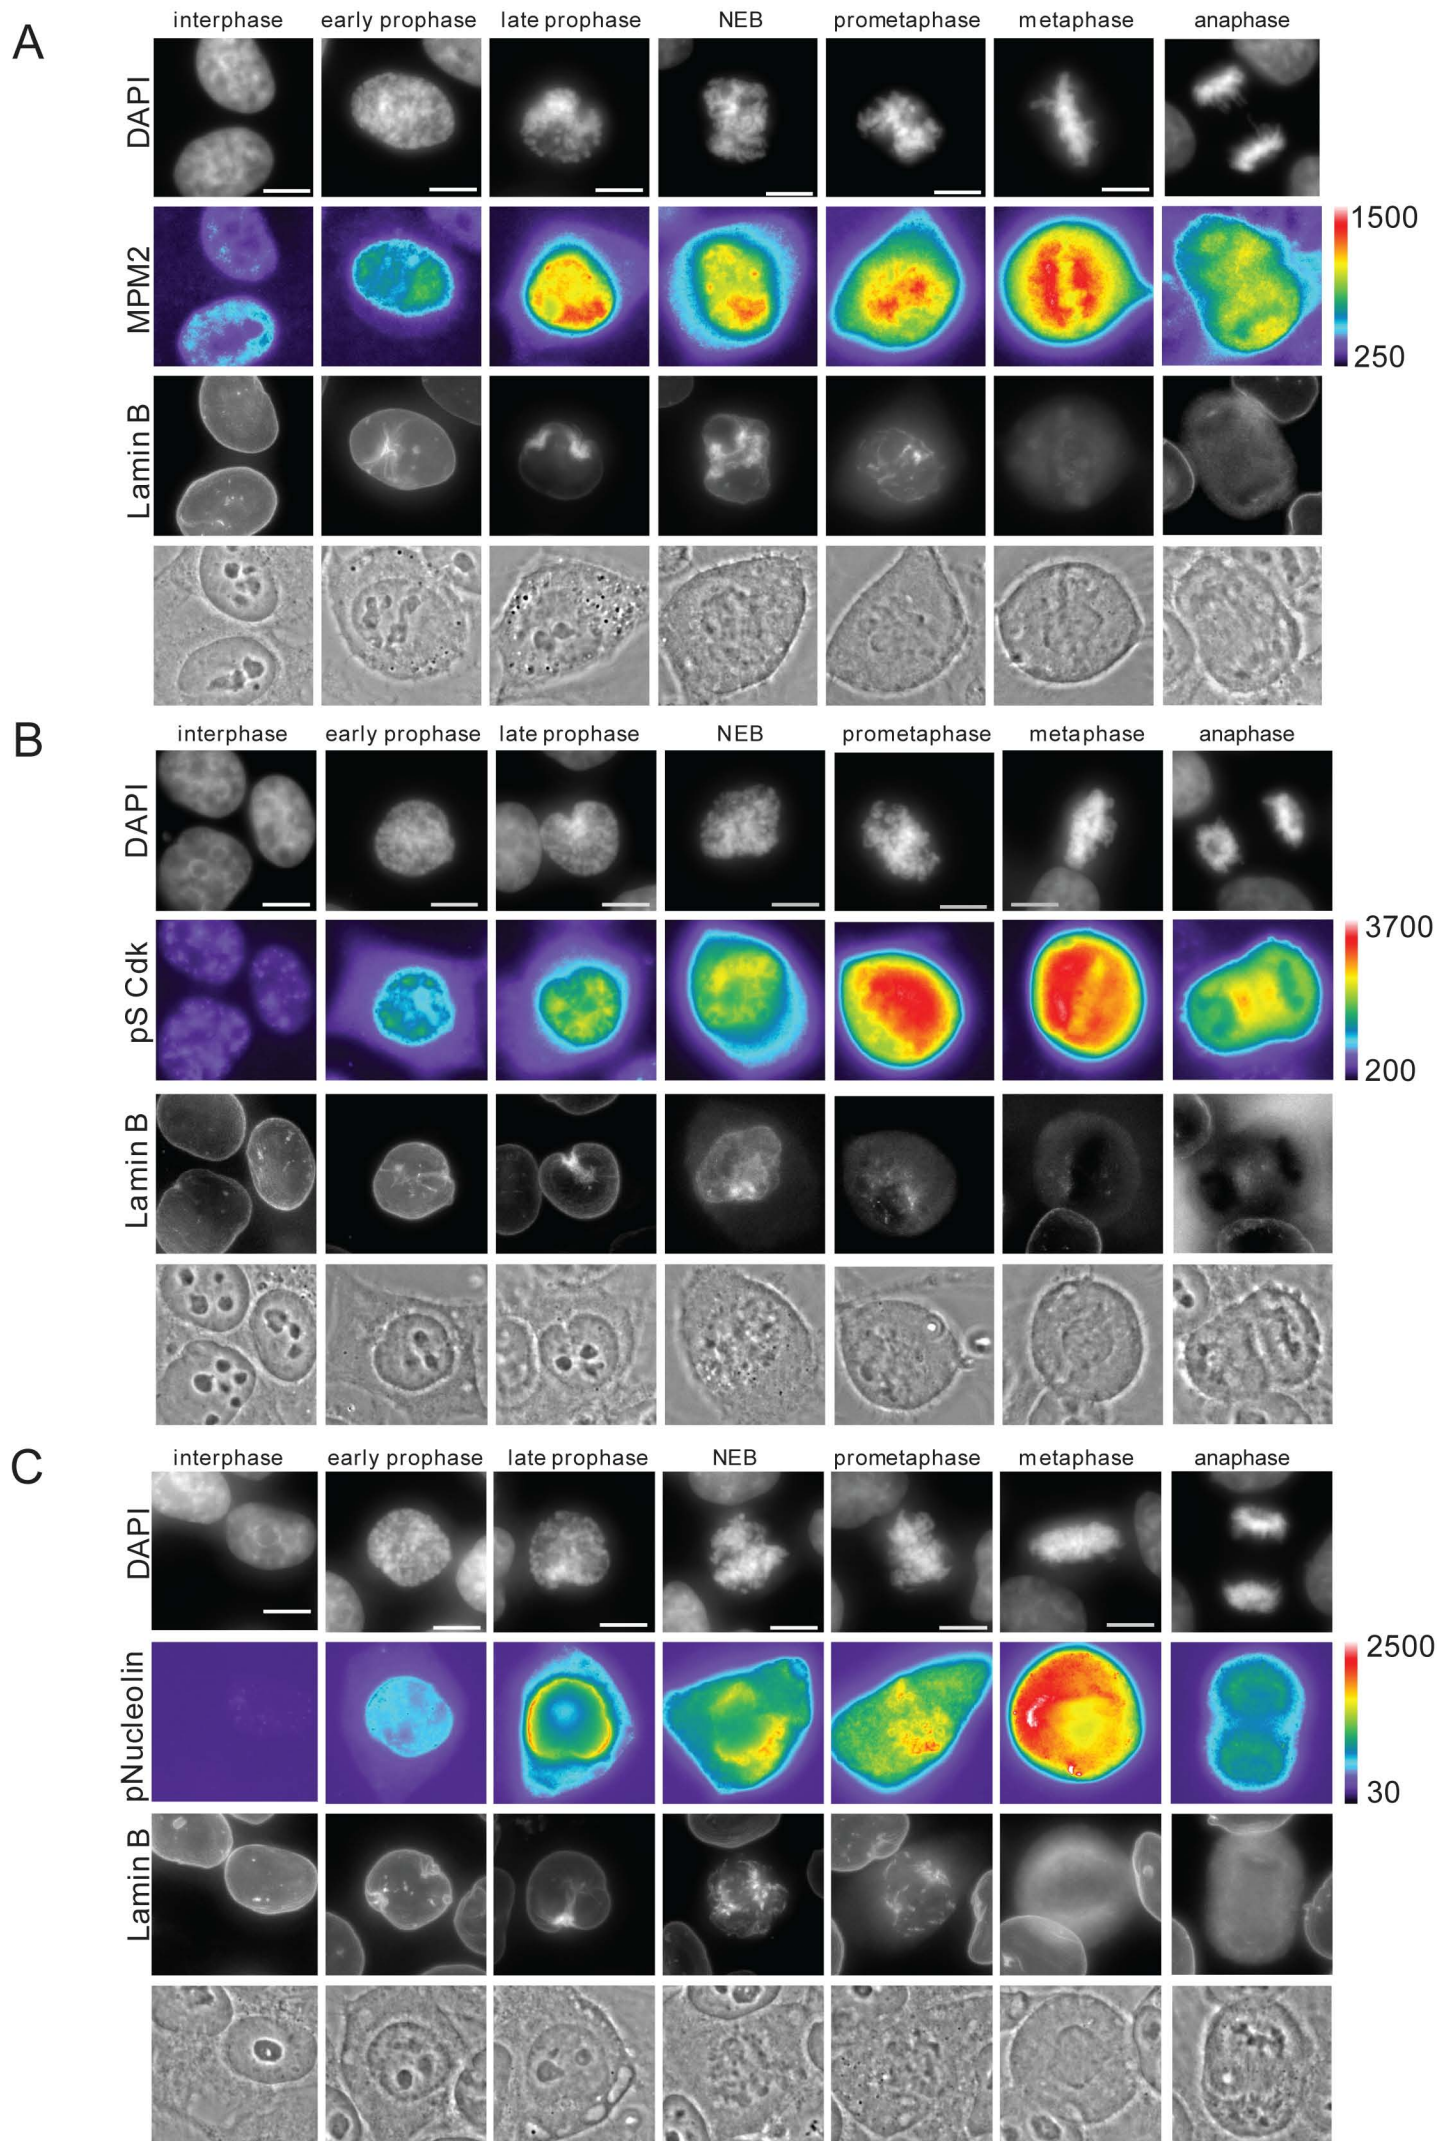

# Supplemental Figure 3

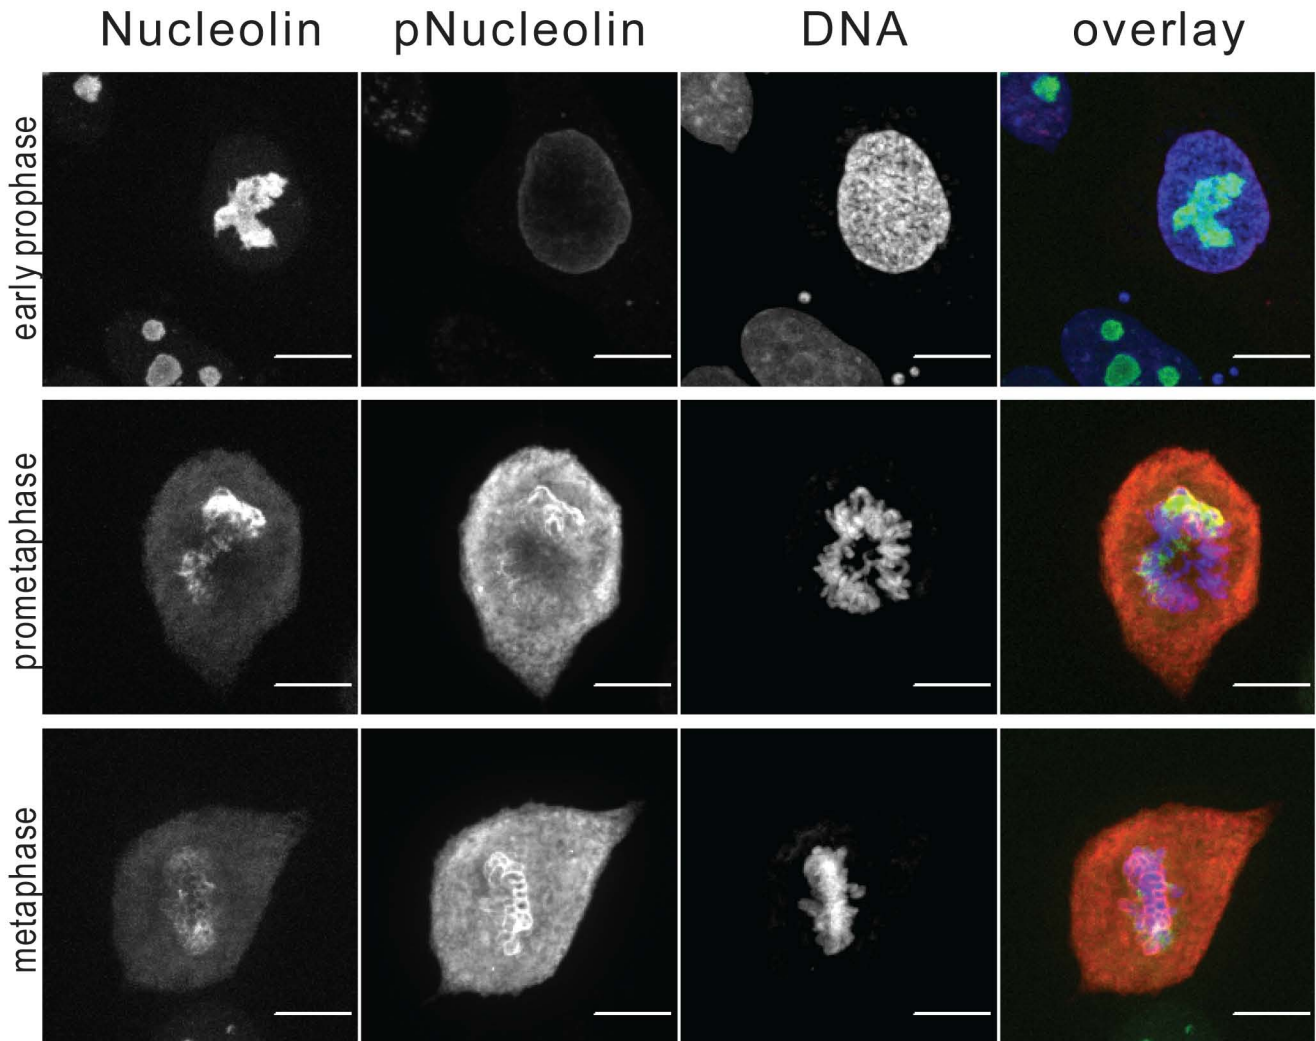

# Supplemental Figure 4

## A HeLa cell

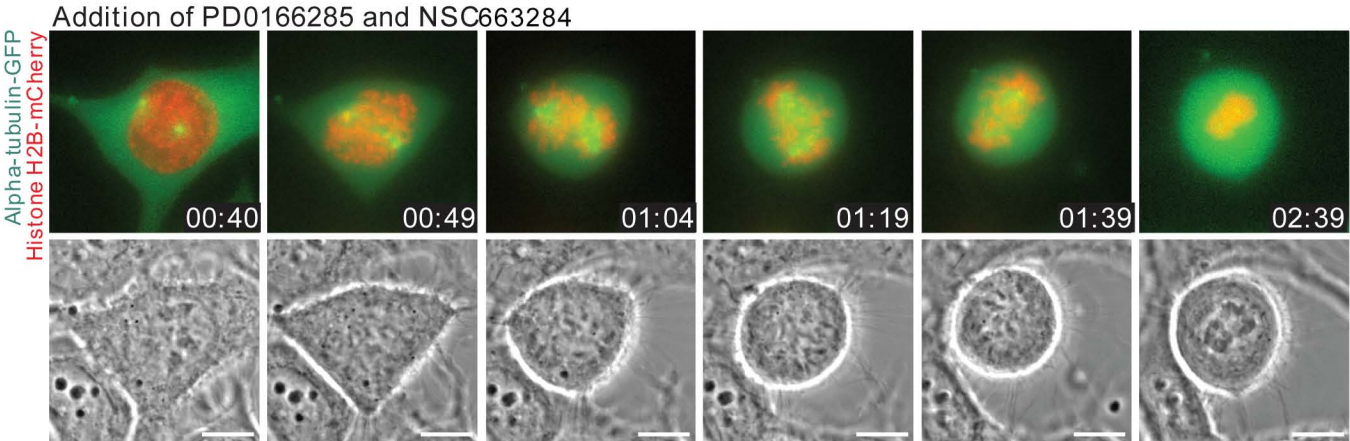

## B RPE-1 cell

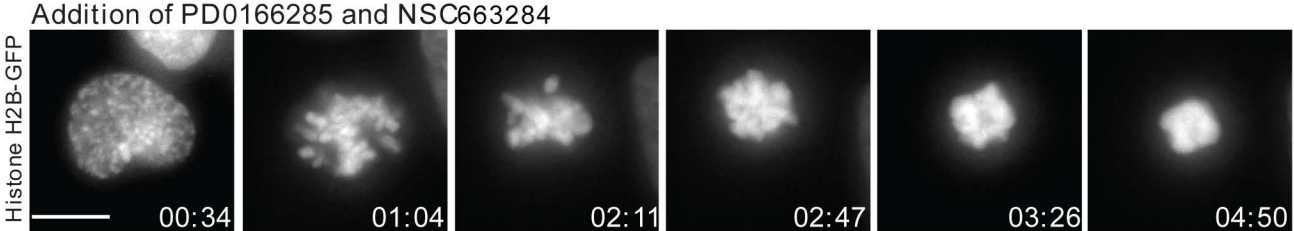



# Supplemental Figure 5

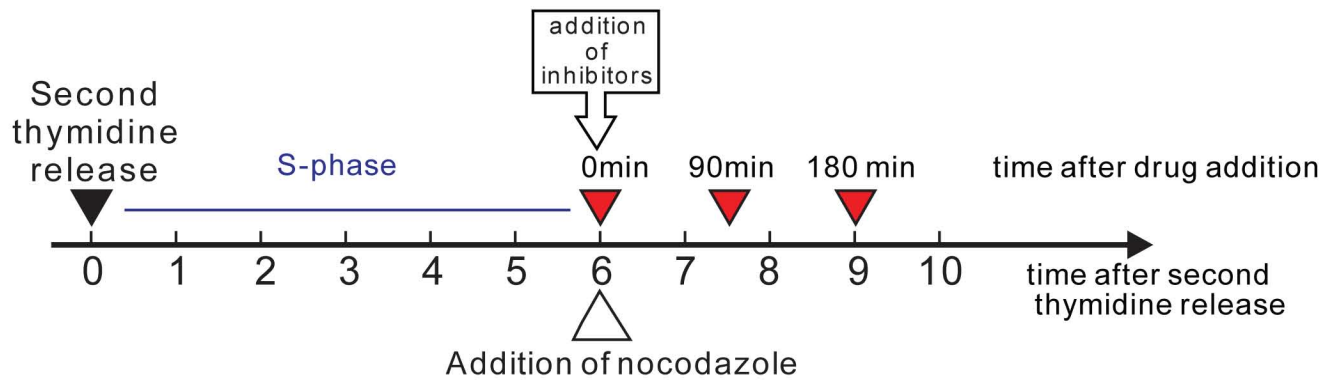

**A**

■ PD0166285   
 ■ PD0166285+NSC663284

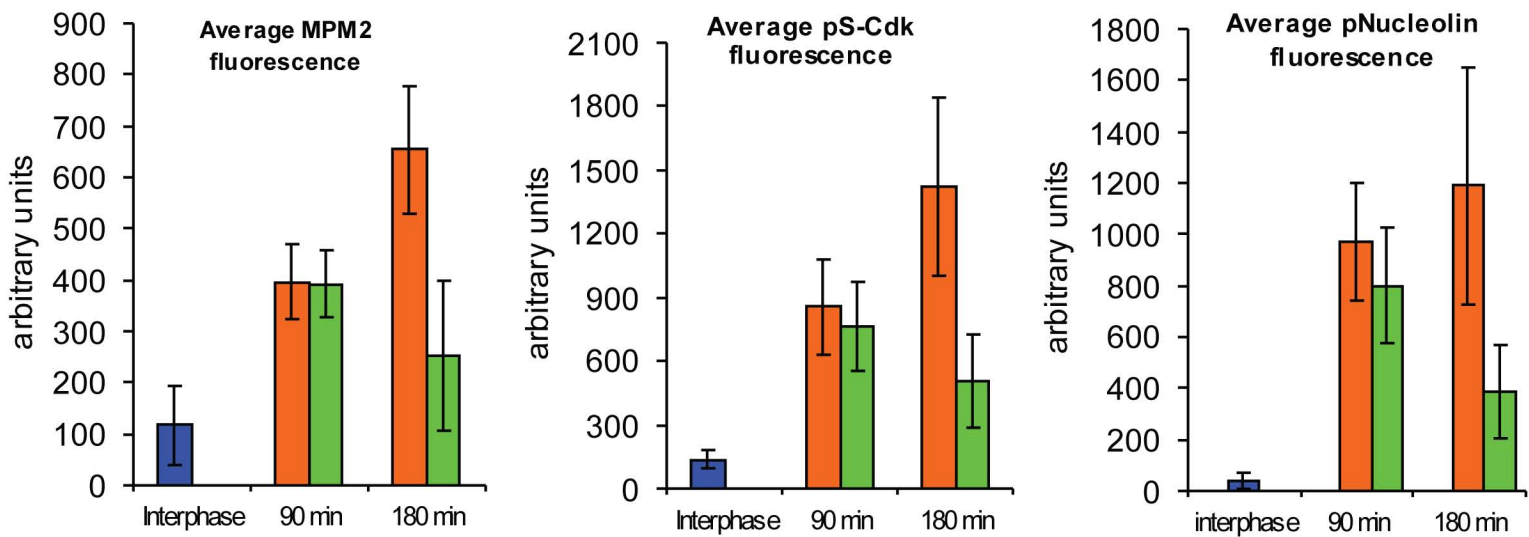

**B**

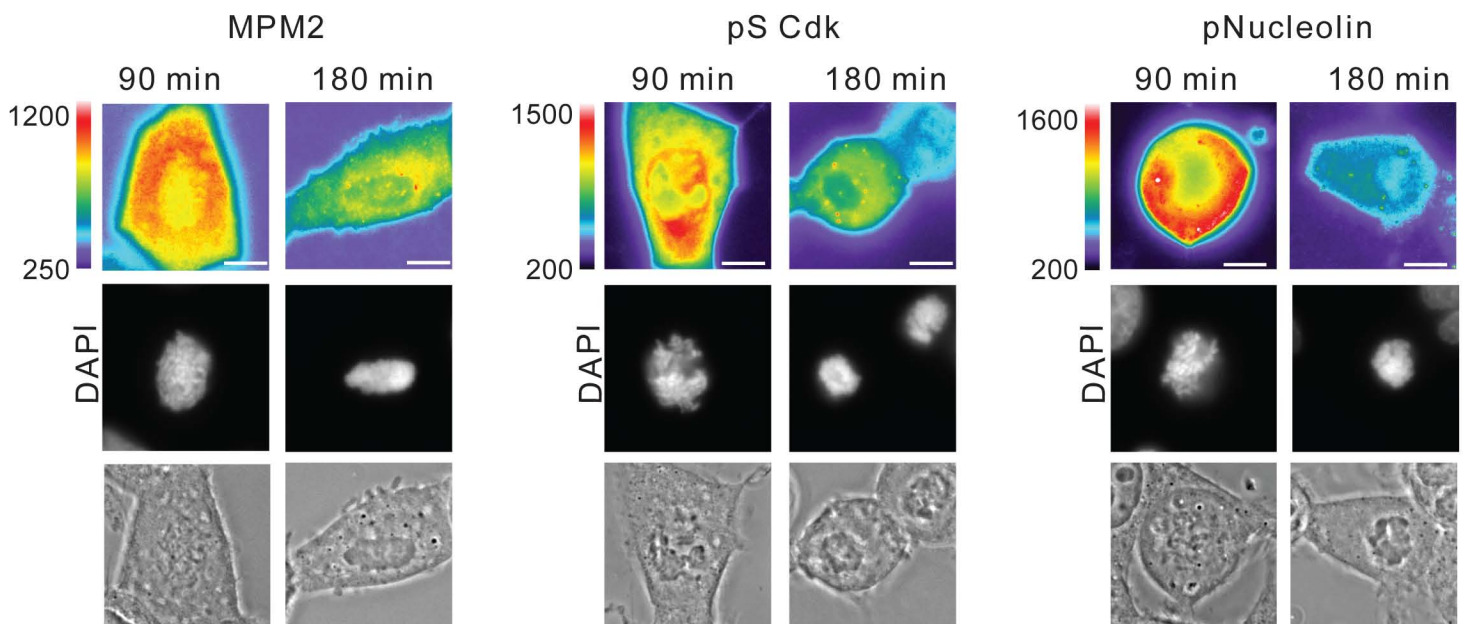

# Supplemental Figure 6

## Negative siRNA

Addition of PD0166285

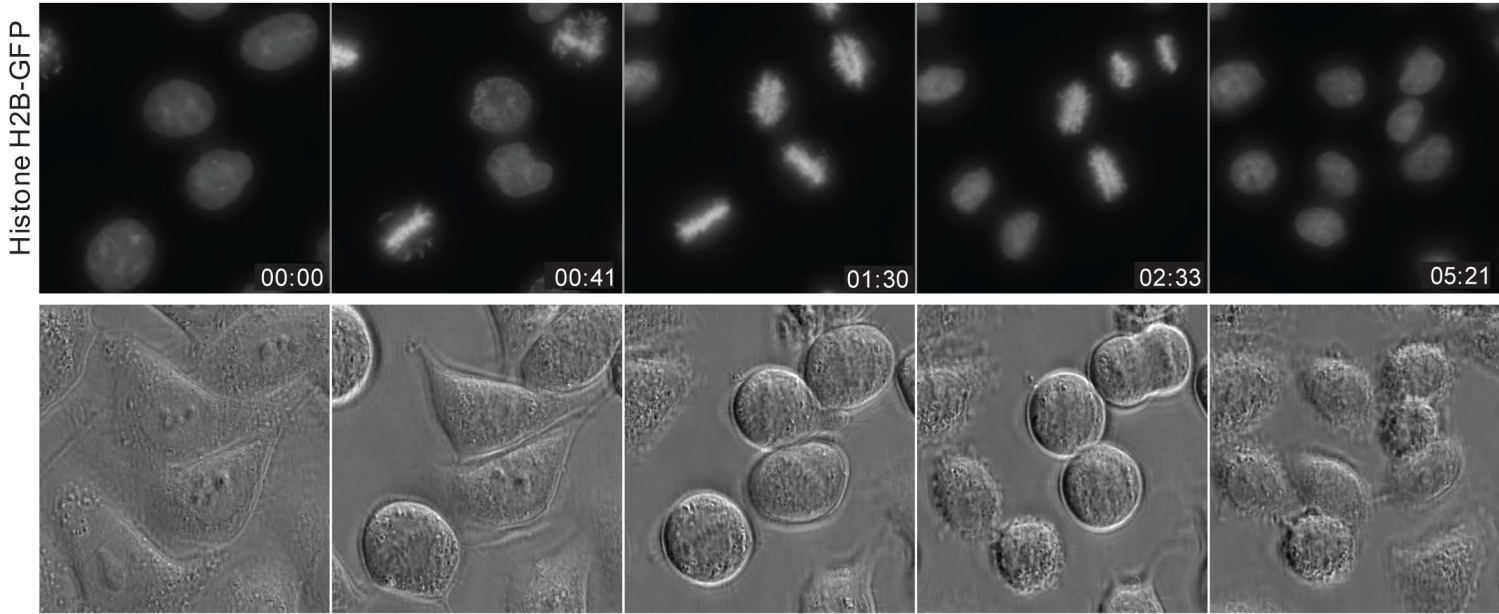

## MastL siRNA

Addition of PD0166285

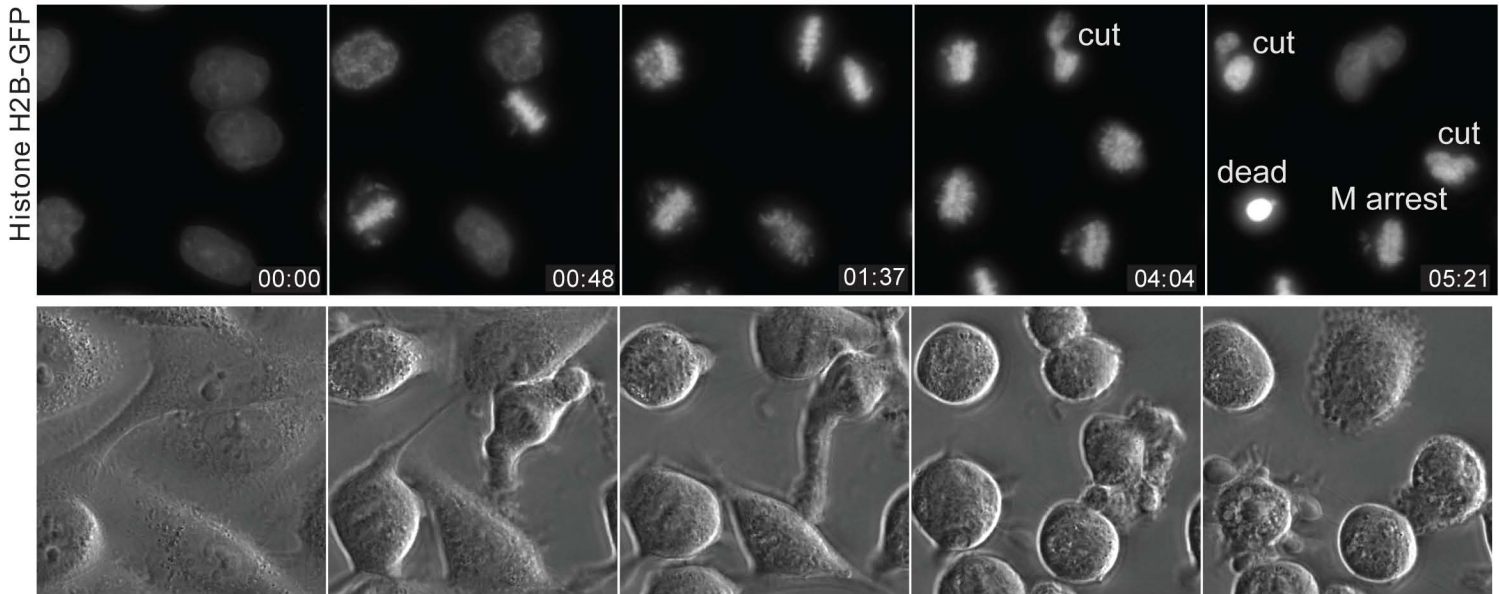

| Defect +PD0166285      | Negative siRNA | MASTL siRNA |
|------------------------|----------------|-------------|
| Number of cells        | 119            | 123         |
| Died in mitosis        | 2.5%           | 34.9%       |
| Segregation defects    | 0%             | 16.3%       |
| No segregation ("cut") | 0%             | 13.0%       |
| Mitotic arrest         | 1.7%           | 15.4%       |

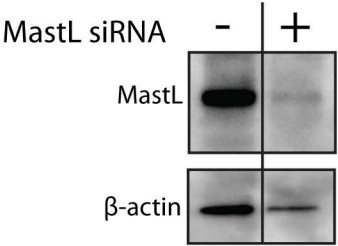

Supplement: E10-07-0599_1.pdf [file E10-07-0599_1.pdf]
